# Supplementary material for: Genomic epidemiology reveals multiple introductions and spread of SARS-CoV-2 in the Indian state of Karnataka
Source: PubMed Central journal article supplement (PMC7746284; doi:10.1371/journal.pone.0243412), 2020-12-17
Supplement: pone.0243412.s006.pdf [file pone.0243412.s006.pdf]

**S4 Table. Description of Contact Clusters.**

|                                                  | State | Our Centre |           |
|--------------------------------------------------|-------|------------|-----------|
|                                                  |       | Tested     | Sequenced |
| Total No of contact clusters                     | 104   | 38         | 17        |
| Total No. of people connected                    | 822   | 398        | 309       |
| Size of cluster                                  |       |            |           |
| 0 – 5                                            | 74    | 22         | 7         |
| > 5                                              | 30    | 16         | 10        |
| <b>Nature of contact/exposure of index case*</b> |       |            |           |
| Contact with COVID-19 case                       | 0     | 0          | 0         |
| No known contact                                 |       |            |           |
| i) Travel History (International)                | 14    | 0          | 0         |
| ii) Travel History (Domestic)                    | 20    | 10         | 5         |
| iii) SARI (under investigation)                  | 29    | 9          | 7         |
| iv) ILI (under investigation)                    | 19    | 4          | 2         |
| v) Under Investigation                           | 10    | 8          | 3         |
| vi) Contact unknown                              | 12    | 7          | 0         |
| <b>Clinical state of index case</b>              |       |            |           |
| Asymptomatic*(Asym)                              | 29    | 19         | 5         |
| Symptomatic (Sym)                                | 75    | 19         | 12        |
| Ratio (Asym: Sym)                                | 0.39  | 1.00       | 0.42      |
| <b>Nature of contact/exposure of spreader**</b>  |       |            |           |
| Contact with COVID-19 case                       | 12    | 4          | 3         |
| No known contact                                 |       |            |           |
| i) Travel History (International)                | 14    | 0          | 0         |
| ii) Travel History (Domestic)                    | 16    | 9          | 4         |
| iii) ILI (under investigation)                   | 19    | 4          | 2         |
| iv) SARI (under investigation)                   | 22    | 7          | 5         |
| v) Under Investigation                           | 10    | 8          | 3         |
| vi) Contact unknown                              | 11    | 6          | 0         |
| <b>Clinical state of spreader</b>                |       |            |           |
| Asymptomatic (Asym)                              | 35    | 20         | 6         |
| Symptomatic (Sym)                                | 69    | 18         | 11        |
| Ratio (Asym: Sym)                                | 0.51  | 1.11       | 0.55      |

\* earliest detected individual from a cluster, \*\* individual with maximum number of connections in a cluster,

Note: Nature of contact/exposure is classified as Contact with COVID-19 case- where tested individual was in contact with a known positive case or No known contact, divided into six categories. i. Travel history (international) - travel history to other countries, ii. Travel history (domestic) - travel within the state or interstate, iii. ILI (under investigation) - individuals with Influenza like illness with no known source of infection, iv. SARI (under investigation) - individuals with severe acute respiratory infection where the source of infection is not known, v. Under investigation- source of infection is not yet known/ contact tracing has not been completed, vi. Contact Unknown- where the tested individual was from a location where there were cases (eg. containment zone) but a specific contact could not be identified.
