# Supplementary material for: Genomic epidemiology reveals multiple introductions and spread of SARS-CoV-2 in the Indian state of Karnataka
Source: PubMed Central journal article supplement (PMC7746284; doi:10.1371/journal.pone.0243412), 2020-12-17
Supplement: pone.0243412.s007.pdf [file pone.0243412.s007.pdf]

**S5 Table. Characteristics of sequenced clusters.**

| Cluster | No. of people | Lineage *           | Age Distribution |       |       |       |        | Clinical State** |     | District                                            |
|---------|---------------|---------------------|------------------|-------|-------|-------|--------|------------------|-----|-----------------------------------------------------|
|         |               |                     | 0-20             | 20-40 | 40-60 | 60-80 | 80-100 | Asym             | Sym |                                                     |
| C1      | 67            | B.1(4),<br>B.1.1(3) | 7                | 46    | 11    | 3     | 0      | 51               | 16  | Mysuru (57), Vijayapura (8), Mandya (2)             |
| C2      | 50            | B.4 (9),<br>B.6(1)  | 10               | 37    | 2     | 1     | 0      | 48               | 2   | Bengaluru Urban (49), Davanagere (1)                |
| C3      | 43            | B.6 (2)             | 10               | 18    | 13    | 2     | 0      | 39               | 4   | Belagavi (41), Tumkur (2)                           |
| C4      | 35            | B.1.80 (12)         | 4                | 23    | 7     | 0     | 1      | 32               | 3   | Bengaluru Urban (35)                                |
| C5      | 27            | B.6 (3)             | 7                | 14    | 5     | 1     | 0      | 26               | 1   | Mandya (20), Mysuru (5), Kalaburgi (2)              |
| C6      | 21            | B.6 (10)            | 4                | 10    | 5     | 2     | 0      | 20               | 1   | Bagalkot (21)                                       |
| C7      | 18            | B.6 (10)            | 1                | 9     | 8     | 0     | 0      | 18               | 0   | Bengaluru Urban (18)                                |
| C8      | 16            | B.6 (1)             | 3                | 6     | 5     | 1     | 1      | 14               | 2   | Bidar (16)                                          |
| C9      | 7             | B.6 (3)             | 4                | 0     | 2     | 1     | 0      | 6                | 1   | Bengaluru Urban (7)                                 |
| C10     | 6             | B (1),<br>B.6 (1)   | 1                | 4     | 1     | 0     | 0      | 5                | 1   | Belagavi (6)                                        |
| C11     | 4             | B.1 (1)             | 1                | 1     | 2     | 0     | 0      | 3                | 1   | Bengaluru Urban (1), Uttara Kannada (1), Others (2) |
| C12     | 3             | B.1 (1)             | 1                | 2     | 0     | 0     | 0      | 2                | 1   | Bengaluru Urban (3)                                 |
| C13     | 3             | B.6 (1)             | 2                | 1     | 0     | 0     | 0      | 3                | 0   | Bidar (3)                                           |
| C14     | 3             | B.6 (1)             | 2                | 1     | 0     | 0     | 0      | 3                | 0   | Bengaluru Urban (3)                                 |
| C15     | 2             | B.6 (1)             | 1                | 1     | 0     | 0     | 0      | 2                | 0   | Bidar (2)                                           |
| C16     | 2             | B.6 (1)             | 1                | 1     | 0     | 0     | 0      | 1                | 1   | Belagavi (2)                                        |
| C17     | 2             | B.6 (1)             | 0                | 1     | 1     | 0     | 0      | 1                | 1   | Bagalkot (2)                                        |

\*Lineages are shown with number of sequences assigned that lineage in brackets

\*\*Clinical State – Asym: Asymptomatic at sample collection, Sym: Symptomatic
