# Supplementary material for: Genomic epidemiology reveals multiple introductions and spread of SARS-CoV-2 in the Indian state of Karnataka
Source: PubMed Central journal article supplement (PMC7746284; doi:10.1371/journal.pone.0243412), 2020-12-17
Supplement: pone.0243412.s010.pdf [file pone.0243412.s010.pdf]

**S8 Table. Accession Numbers**

| <b>BioProject Accession ID. PRJNA670824</b> |                                 |                            |                             |
|---------------------------------------------|---------------------------------|----------------------------|-----------------------------|
| <b>Sr. No</b>                               | <b>GISAID Virus name</b>        | <b>GISAID Accession ID</b> | <b>GenBank Accession ID</b> |
| 1                                           | hCoV-19/India/KA-nimh-0113/2020 | EPI_ISL_428479             | MT396247                    |
| 2                                           | hCoV-19/India/KA-nimh-0116/2020 | EPI_ISL_428480/515932      | MW191497                    |
| 3                                           | hCoV-19/India/KA-nimh-0130/2020 | EPI_ISL_428481             | MT396243                    |
| 4                                           | hCoV-19/India/KA-nimh-0182/2020 | EPI_ISL_428482             | MT396242                    |
| 5                                           | hCoV-19/India/KA-nimh-0318/2020 | EPI_ISL_428483             | MT396246                    |
| 6                                           | hCoV-19/India/KA-nimh-0351/2020 | EPI_ISL_428484             | MT396245                    |
| 7                                           | hCoV-19/India/KA-nimh-0834/2020 | EPI_ISL_428485             | MW191498                    |
| 8                                           | hCoV-19/India/KA-nimh-0916/2020 | EPI_ISL_515933             | MW181790                    |
| 9                                           | hCoV-19/India/KA-nimh-0996/2020 | EPI_ISL_428486             | MT396248                    |
| 10                                          | hCoV-19/India/KA-nimh-0999/2020 | EPI_ISL_486382             | MW191499                    |
| 11                                          | hCoV-19/India/KA-nimh-1071/2020 | EPI_ISL_428487             | MT396244                    |
| 12                                          | hCoV-19/India/KA-nimh-1090/2020 | EPI_ISL_516075             | MW181791                    |
| 13                                          | hCoV-19/India/KA-nimh-1114/2020 | EPI_ISL_516076             | MW181792                    |
| 14                                          | hCoV-19/India/KA-nimh-1398/2020 | EPI_ISL_515934             | MW181793                    |
| 15                                          | hCoV-19/India/KA-nimh-1400/2020 | EPI_ISL_515935             | MW181794                    |
| 16                                          | hCoV-19/India/KA-nimh-1407/2020 | EPI_ISL_515936             | MW181795                    |
| 17                                          | hCoV-19/India/KA-nimh-1441/2020 | EPI_ISL_591540             | MW191500                    |
| 18                                          | hCoV-19/India/KA-nimh-1453/2020 | EPI_ISL_516077             | MW181796                    |
| 19                                          | hCoV-19/India/KA-nimh-1454/2020 | EPI_ISL_486392             | MW181797                    |
| 20                                          | hCoV-19/India/KA-nimh-1456/2020 | EPI_ISL_583915             | MW181798                    |
| 21                                          | hCoV-19/India/KA-nimh-1519/2020 | EPI_ISL_515937             | MW181799                    |
| 22                                          | hCoV-19/India/KA-nimh-1553/2020 | EPI_ISL_486393             | MW181800                    |
| 23                                          | hCoV-19/India/KA-nimh-1596/2020 | EPI_ISL_436156             | MT434759                    |
| 24                                          | hCoV-19/India/KA-nimh-1598/2020 | EPI_ISL_436157             | MT434760                    |
| 25                                          | hCoV-19/India/KA-nimh-1600/2020 | EPI_ISL_516078             | MW181801                    |
| 26                                          | hCoV-19/India/KA-nimh-2873/2020 | EPI_ISL_436137             | MT434757                    |
| 27                                          | hCoV-19/India/KA-nimh-3033/2020 | EPI_ISL_515938             | MW191501                    |
| 28                                          | hCoV-19/India/KA-nimh-3045/2020 | EPI_ISL_515939             | MW191502                    |
| 29                                          | hCoV-19/India/KA-nimh-3047/2020 | EPI_ISL_515940             | MW181802                    |
| 30                                          | hCoV-19/India/KA-nimh-3720/2020 | EPI_ISL_486394             | MW181802                    |
| 31                                          | hCoV-19/India/KA-nimh-3948/2020 | EPI_ISL_515941             | MW181803                    |
| 32                                          | hCoV-19/India/KA-nimh-3952/2020 | EPI_ISL_436138             | MT434758                    |
| 33                                          | hCoV-19/India/KA-nimh-3959/2020 | EPI_ISL_486383             | MW181805                    |
| 34                                          | hCoV-19/India/KA-nimh-3964/2020 | EPI_ISL_515942             | MW181806                    |

|    |                                 |                |          |
|----|---------------------------------|----------------|----------|
| 35 | hCoV-19/India/KAnimh-3970/2020  | EPI_ISL_436139 | MT439597 |
| 36 | hCoV-19/India/KAnimh-3975/2020  | EPI_ISL_486881 | MW181807 |
| 37 | hCoV-19/India/KAnimh-4263/2020  | EPI_ISL_486395 | MW181808 |
| 38 | hCoV-19/India/KAnimh-4376/2020  | EPI_ISL_436140 | MT439595 |
| 39 | hCoV-19/India/KAnimh-4377/2020  | EPI_ISL_486396 | MW181809 |
| 40 | hCoV-19/India/KAnimh-4378/2020  | EPI_ISL_436141 | MT439596 |
| 41 | hCoV-19/India/KAnimh-5102/2020  | EPI_ISL_486397 | MW181810 |
| 42 | hCoV-19/India/KAnimh-5297/2020  | EPI_ISL_486398 | MW181811 |
| 43 | hCoV-19/India/KAnimh-7139/2020  | EPI_ISL_515943 | MW181812 |
| 44 | hCoV-19/India/KAnimh-7151/2020  | EPI_ISL_515944 | MW181813 |
| 45 | hCoV-19/India/KAnimh-7817/2020  | EPI_ISL_486399 | MW181814 |
| 46 | hCoV-19/India/KAnimh-8863/2020  | EPI_ISL_486384 | MW181815 |
| 47 | hCoV-19/India/KAnimh-10102/2020 | EPI_ISL_486385 | MW181816 |
| 48 | hCoV-19/India/KAnimh-10106/2020 | EPI_ISL_486386 | MW181817 |
| 49 | hCoV-19/India/KAnimh-10559/2020 | EPI_ISL_486400 | MW193967 |
| 50 | hCoV-19/India/KAnimh-11068/2020 | EPI_ISL_515945 | MW181818 |
| 51 | hCoV-19/India/KAnimh-11069/2020 | EPI_ISL_515946 | MW181819 |
| 52 | hCoV-19/India/KAnimh-11070/2020 | EPI_ISL_486401 | MW181820 |
| 53 | hCoV-19/India/KAnimh-11071/2020 | EPI_ISL_515947 | MW181821 |
| 54 | hCoV-19/India/KAnimh-11074/2020 | EPI_ISL_515948 | MW181822 |
| 55 | hCoV-19/India/KAnimh-11076/2020 | EPI_ISL_486402 | MW181823 |
| 56 | hCoV-19/India/KAnimh-11078/2020 | EPI_ISL_583914 | MW181824 |
| 57 | hCoV-19/India/KAnimh-11122/2020 | EPI_ISL_486387 | MW181825 |
| 58 | hCoV-19/India/KAnimh-11164/2020 | EPI_ISL_486403 | MW181826 |
| 59 | hCoV-19/India/KAnimh-11194/2020 | EPI_ISL_515949 | MW181827 |
| 60 | hCoV-19/India/KAnimh-11866/2020 | EPI_ISL_515950 | MW191503 |
| 61 | hCoV-19/India/KAnimh-11867/2020 | EPI_ISL_515951 | MW191504 |
| 62 | hCoV-19/India/KAnimh-11872/2020 | EPI_ISL_515952 | MW181828 |
| 63 | hCoV-19/India/KAnimh-11877/2020 | EPI_ISL_486404 | MW191505 |
| 64 | hCoV-19/India/KAnimh-12171/2020 | EPI_ISL_515953 | MW193966 |
| 65 | hCoV-19/India/KAnimh-13855/2020 | EPI_ISL_515954 | MW181829 |
| 66 | hCoV-19/India/KAnimh-13894/2020 | EPI_ISL_515955 | MW191506 |
| 67 | hCoV-19/India/KAnimh-14359/2020 | EPI_ISL_515956 | MW181830 |
| 68 | hCoV-19/India/KAnimh-14709/2020 | EPI_ISL_486405 | MW181831 |
| 69 | hCoV-19/India/KAnimh-14712/2020 | EPI_ISL_486406 | MW191507 |
| 70 | hCoV-19/India/KAnimh-14715/2020 | EPI_ISL_486407 | MW191508 |
| 71 | hCoV-19/India/KAnimh-14722/2020 | EPI_ISL_515957 | MW181832 |
| 72 | hCoV-19/India/KAnimh-14723/2020 | EPI_ISL_486388 | MW181833 |

|    |                                  |                |          |
|----|----------------------------------|----------------|----------|
| 73 | hCoV-19/India/KA-nimh-14834/2020 | EPI_ISL_515958 | MW181834 |
| 74 | hCoV-19/India/KA-nimh-14835/2020 | EPI_ISL_515959 | MW181835 |
| 75 | hCoV-19/India/KA-nimh-15365/2020 | EPI_ISL_515960 | MW181836 |
| 76 | hCoV-19/India/KA-nimh-15819/2020 | EPI_ISL_486408 | MW181837 |
| 77 | hCoV-19/India/KA-nimh-15833/2020 | EPI_ISL_515961 | MW181838 |
| 78 | hCoV-19/India/KA-nimh-15835/2020 | EPI_ISL_486389 | MW181839 |
| 79 | hCoV-19/India/KA-nimh-15896/2020 | EPI_ISL_486409 | MW181840 |
| 80 | hCoV-19/India/KA-nimh-15899/2020 | EPI_ISL_515962 | MW181841 |
| 81 | hCoV-19/India/KA-nimh-17585/2020 | EPI_ISL_515963 | MW191509 |
| 82 | hCoV-19/India/KA-nimh-17608/2020 | EPI_ISL_515964 | MW191510 |
| 83 | hCoV-19/India/KA-nimh-17998/2020 | EPI_ISL_515965 | MW181842 |
| 84 | hCoV-19/India/KA-nimh-19184/2020 | EPI_ISL_515966 | MW191511 |
| 85 | hCoV-19/India/KA-nimh-19188/2020 | EPI_ISL_515967 | MW191512 |
| 86 | hCoV-19/India/KA-nimh-19510/2020 | EPI_ISL_515968 | MW181843 |
| 87 | hCoV-19/India/KA-nimh-19669/2020 | EPI_ISL_515969 | MW181844 |
| 88 | hCoV-19/India/KA-nimh-19688/2020 | EPI_ISL_515970 | MW181845 |
| 89 | hCoV-19/India/KA-nimh-19696/2020 | EPI_ISL_515971 | MW181846 |
| 90 | hCoV-19/India/KA-nimh-19712/2020 | EPI_ISL_515972 | MW181847 |
| 91 | hCoV-19/India/KA-nimh-19716/2020 | EPI_ISL_515973 | MW181848 |
